1 **Season-specific carry-over of early-life associations in a monogamous bird**  
2 **species**

3

4 Ralf H.J.M. Kurvers<sup>1,2,\*</sup>, Lea Prox<sup>3,4</sup>, Damien R. Farine<sup>4,5,6</sup>, Coretta Jongeling<sup>2</sup> & Lysanne  
5 Snijders<sup>7,8</sup>

6

7 <sup>1</sup> Center for Adaptive Rationality, Max Planck Institute for Human Development, Lentzeallee  
8 94, 14195 Berlin, Germany

9 <sup>2</sup> Resource Ecology Group, Wageningen University and Research, Droevendaalsesteeg 3a,  
10 6708 PB Wageningen, the Netherlands

11 <sup>3</sup> Behavioral Ecology & Sociobiology Unit, German Primate Center, Kellnerweg 4, 37077  
12 Göttingen, Germany

13 <sup>4</sup> Department of Biology, University of Konstanz, Universitätsstraße 10, 78464 Konstanz,  
14 Germany

15 <sup>5</sup> Department of Collective Behavior, Max Planck Institute of Animal Behavior,  
16 Universitätsstraße 10, 78464 Konstanz, Germany.

17 <sup>6</sup> Centre for the Advanced Study of Collective Behaviour, University of Konstanz,  
18 Universitätsstraße 10, 78464 Konstanz, Germany

19 <sup>7</sup> Department of Evolutionary Ecology, Leibniz Institute for Zoo and Wildlife Research,  
20 Alfred-Kowalke-Straße 17, 10315 Berlin, Germany

21 <sup>8</sup> Behavioural Ecology Group, Wageningen University and Research, De Elst 1, 6708 WD  
22 Wageningen, the Netherlands

23

24 \* Author for correspondence: [kurvers@mpib-berlin.mpg.de](mailto:kurvers@mpib-berlin.mpg.de); Tel: +49 30 82406-472

25

26 **Abstract**

27 Social relationships can have important fitness consequences. Although there is increasing  
28 evidence that social relationships carry over across contexts, few studies have investigated  
29 whether relationships formed early in life are carried over to adulthood. For example,  
30 juveniles of monogamous species go through a major life-history stage transition—pair  
31 formation—during which the pair bond becomes a central unit of the social organization. At  
32 present, it remains unclear if pair members retain their early-life relationships after pair  
33 formation. We investigated whether same-sex associations formed early in life carry over into  
34 adulthood and whether carry-over was dependent on season, in a monogamous species.  
35 Moreover, we investigated the role of familiarity, genetic relatedness and aggression on the  
36 perseverance of social associations. We studied the social structure before and after pair  
37 formation in captive barnacle geese (*Branta leucopsis*), a highly social, long-lived,  
38 monogamous species. We constructed association networks of groups of geese before pair  
39 formation, during the subsequent breeding season, and in the following wintering season.  
40 Next, we studied how these associations carried over during seasonal changes. We found that  
41 early-life associations in females were lost during the breeding season, but resurfaced during  
42 the subsequent wintering season. In males, the early-life associations persisted across both  
43 seasons. Association persistence was not mediated by genetic relatedness or familiarity. The  
44 high level of aggressiveness of males, but not females, in the breeding season suggests that  
45 males may have played a key role in shaping both their own social environment and that of  
46 their partners. We show that early-life social relationships can be maintained well into later  
47 life. Such relationships can be sustained even if they are temporarily disrupted, for example  
48 due to reproductive behaviour. Our findings therefore highlight that the early-life social  
49 environment can have life-long consequences on individuals' social environment.

50

51 **Key-words:** aggression, early life, familiarity, genetic relatedness, monogamous, pair  
52 formation, social relationships, social associations

53

## 54 **Introduction**

55 The adaptive nature of sociality is a long-standing topic in ecology and evolution (Alexander,  
56 1974; Krause & Ruxton, 2002), particularly the potential costs and benefits of maintaining  
57 stable social relationships. Repeated social interactions between the same individuals have,  
58 for example, been linked to faster predator-evasion responses, increased foraging success  
59 (Carter et al., 2009; Griffiths et al., 2004), and can, ultimately, affect fitness (Beletsky &  
60 Orians, 1989; Cameron et al., 2009; Kohn, 2017; Silk, 2007; Silk et al., 2009, 2010).

61 There is increasing evidence showing that social relationships carry over across time,  
62 place, and context. Shizuka et al. (2014) showed that golden-crowned sparrows (*Zonotrichia*  
63 *atricapilla*) that flocked together in one winter flocked together in the subsequent winter more  
64 often than expected based on the degree of home range overlap. Roosting associations in  
65 Bechstein's bats (*Myotis bechsteinii*) and Natterer's bats (*Myotis nattereri*) were found to  
66 remain stable across several years despite high fission-fusion dynamics (Kerth et al., 2011;  
67 Zeus et al., 2018). Stanley et al. (2018) revealed that, despite seasonal fluctuations in  
68 gregariousness and overall weak social associations, semi-feral ponies (*Equus caballus*)  
69 maintained stable association preferences over three years. Finally, Firth and Sheldon (2016)  
70 showed that great tits' (*Parus major*) winter social associations carried over into their  
71 subsequent breeding season, as individuals bred nearer to those they were most associated  
72 with during winter. Despite evidence that social associations between individuals can persist  
73 across time and context, it is still largely unknown when these relationships are formed in the  
74 first place.

75 Experiences in early life are known to regularly carry over to adulthood, influencing  
76 survival and reproductive performance (Lindström, 1999). Early-life social conditions are  
77 generally known to have long-lasting effects (Langenhof & Komdeur, 2018; Leris & Reader,  
78 2016; Stanton & Mann, 2012; Szipl et al., 2019). Despite the likely significance of the early-

79 life period for the formation of social relationships, only a few studies have tracked the social  
80 associations of the same individuals from their early life into adulthood (e.g., Carter et al.,  
81 2013; Linklater & Cameron, 2009; Mitani, 2009), and almost exclusively in mammals (but  
82 see Frigerio et al., 2001 for long-term associations between female siblings in geese). As they  
83 mature, individuals of many taxa go through major life-history transitions, such as dispersal  
84 (Blumstein et al., 2009; Linklater & Cameron, 2009) and pair formation (Kurvers et al.,  
85 2013). These transitions will strongly impact the structure of an individual's social  
86 environment, but perturbations in the social environment do not necessarily impact the  
87 stability of already-established relationships (e.g., Kerth et al., 2011). It remains an open  
88 question if a life-history transition such as pair formation will cause preferred associations  
89 formed in early life to disappear or whether these may persist into adulthood.

90 Here, we examined the social structure of barnacle geese, a highly social species,  
91 before and after pair formation, in order to study the persistence (or disappearance) of early-  
92 life same-sex associations after a major life-history transition: pair formation. Barnacle geese  
93 are long-lived monogamous birds, which generally find a partner at 2–3 years of age  
94 (Choudhury & Black, 1994). Barnacle geese are very selective in choosing a mate; they  
95 sample one to six potential mates in so-called “trial liaisons” before settling with a permanent  
96 partner (Choudhury & Black, 1993; van der Jeugd & Blaakmeer, 2001). The pair bond is  
97 extremely strong and pair members generally stay in close proximity to each other and remain  
98 together until one of them dies (Black, 2001; Owen et al., 1988). Pairs with a longer pair bond  
99 show higher reproductive success than pairs with a shorter pair bond (Black, 2001). Pair  
100 formation is thus a crucial step in the life history of geese. Here we took advantage of  
101 controlled experiments to study how pair formation impacted same-sex foraging associations  
102 formed early in life, allowing us to circumvent problems with missing individuals in  
103 naturalistic data. We followed a captive population of barnacle geese over several years,  
104 quantifying the dyadic association strength between individual geese before and after pair

105 formation. To study mediating factors underlying the potential persistence of these dyadic  
106 associations, we furthermore quantified the degree of familiarity and genetic relatedness in  
107 the population, as well as individuals' aggressive interactions. We focused on the persistence  
108 of same-sex associations because, in comparison to inter-sex associations, these relationships  
109 are less well studied in monogamous social species, but may have important adaptive  
110 benefits, for example stress-reduction (Sachser et al., 1998), especially in competitive  
111 contexts such as foraging.

112 In the wild, barnacle geese, like many migratory waterfowl, show a high site fidelity  
113 to their breeding, wintering and staging areas (Percival, 1991; Robertson & Cooke, 1999),  
114 creating opportunities for long-term maintenance of social relationships established early in  
115 life. Both sexes show natal philopatry, though females have substantially higher levels of  
116 natal philopatry than males (van der Jeugd, 2001; van der Jeugd et al., 2002). The extent to  
117 which individuals maintain non-sexual relationships across seasons is not well understood,  
118 partly because of the challenges of following individuals across space and time. van der Jeugd  
119 et al. (2002) showed that during breeding, female, but not male, barnacle geese nested closer  
120 to siblings than expected by chance. This occurred not only when the female siblings bred in  
121 the same island as their parents, but also when they nested on a different island. Moreover,  
122 this relationship was only observed for siblings hatched in the same year. Similar sex-specific  
123 patterns have been observed in terms of resting proximity in semi-feral greylag geese, *Anser*  
124 *anser*, in winter (Frigerio et al., 2001). Given these observations and females being the more  
125 philopatric sex, we predicted that females would show a higher likelihood of maintaining their  
126 early-life relationships than males after mating.

127 We constructed association matrices from foraging observations collected during the  
128 breeding and wintering seasons. Geese are generally more gregarious during the wintering  
129 season (Black et al., 2014; Szípl et al., 2019), while being more aggressive and territorial  
130 during the breeding season (Owen & Wells, 1979). We, therefore, predicted that associations

131 with early-life companions after pair formation would be stronger in the wintering than the  
132 breeding season. Finally, based on the expected direct and indirect adaptive benefits of  
133 associating with kin, for example by providing and receiving social support (Black & Owen,  
134 1989; Raveling et al., 2000; Scheiber et al., 2009; Scheiber et al., 2005), we predicted that  
135 genetic relatedness would positively impact the strength of the associations. Similarly, based  
136 on the expected benefits of reduced aggression between familiar individuals (i.e. “dear enemy  
137 effect”; van der Jeugd, 2001; Ydenberg et al., 1988), we predicted that long-term familiarity  
138 would positively influence dyadic foraging association strength.

139

140

## 141 **Methods**

142

### 143 **Study subjects**

144 In late 2007 we obtained two mixed-sex groups of barnacle geese (see Fig. 1 for study  
145 timeline, and Kurvers et al., 2013 for more details). The two groups consisted of 21 (13  
146 female, 8 male) and 23 individuals (8 female, 15 male) respectively. The groups were housed  
147 in separate outdoor aviaries (12 x 15 m) at the Netherlands Institute of Ecology (NIOO) in  
148 Heteren, the Netherlands. Groups were visually, but not acoustically, isolated from each  
149 other. The aviaries consisted of bare soil with a large pond (6 x 1 m) with running water for  
150 drinking and bathing. Birds received ad libitum food consisting of a mixture of grains and  
151 pellets occasionally supplemented with grass. Most individuals (40 of 44) were hatched in  
152 2007 and were thus approximately 5 months old upon arrival. All birds were captive-hatched,  
153 wing-clipped and (upon arrival) fitted with uniquely coded white leg rings for identification.  
154 Birds from the two groups had different origins, implying that birds within (but not between)  
155 groups could have a high genetic relatedness (see below). Birds within a group will

156 henceforth be referred to as “familiar” individuals, and birds between groups as “unfamiliar”.  
157 Geese lived for approximately 1.5 years in these familiarity groups before the start of the  
158 social network observations (see below).

159

## 160 **Genetic relatedness**

161 We determined the genetic relatedness between each pair of individuals using a high-  
162 resolution 374 single nucleotide polymorphism (SNP) marker set, developed for the barnacle  
163 goose (Jonker et al., 2012). We took a small blood sample ( $\pm 1$  ml) from each individual from  
164 the brachial vein and preserved it in ethanol. Entire genomic DNA was isolated using the  
165 Genra Systems Puregene DNA purification kit. Genotyping was conducted with Vera Code  
166 assays on an Illumina BeadXpress (described in Kraus et al., 2011). We calculated the  
167 pairwise genetic relatedness ( $r$ ) using the program Coancestry (version 1, Wang, 2011). To  
168 determine which relatedness estimator best fitted our data, we used the empirical SNP allele  
169 frequencies of our population and simulated 500 dyads of geese of varying relatedness  
170 coefficients. Meeting real conditions as closely as possible, we simulated mainly unrelated  
171 dyads ( $N = 430$ ) but also dyads of close familial relationships, namely 30 full sibs dyads ( $r =$   
172  $0.5$ ), 10 half sibs dyads ( $r = 0.25$ ), and 30 first cousins dyads ( $r = 0.125$ ). Based on this  
173 simulation, we found that the maximum-likelihood estimator of Milligan (2003) performed  
174 best and used it for the final estimation of  $r$ . This produced a strong correlation with expected  
175 values of  $r$  ( $r^2 = 0.9$ ; analysis of the simulated data set carried out with default settings).  
176 Subsequently, all pairwise relatedness values of the experimental geese were obtained from  
177 Coancestry with standard settings (see Kurvers et al., 2013 for more details).

178

## 179 **Observations prior to pair formation: early life**

180 After living for approximately 1.5 years in their respective familiarity groups—and prior to  
181 any pair formation—we separated all geese into two single-sex groups (June 2009; Fig. 1) to



182 study the factors shaping intra-sexual social association preferences while avoiding additional  
183 ‘noise’ caused by inter-sexual trial-liaisons (van der Jeugd & Blaakmeer, 2001). Moreover, by  
184 separating individuals in single-sex groups, we could control the timing of pair formation and  
185 keep this comparable and tractable for all subjects. Geese were sexed by visual inspection of  
186 sexual organs in the cloaca. The sex of one individual could not be reliably determined at this  
187 time. This individual was not included in the early-life observations, but joined the flock after  
188 these observations finished. This individual was excluded from all analyses. Association  
189 observations were conducted in the home aviaries during foraging. These foraging  
190 associations were studied on five grass patches (40 x 20 cm, 1.5m apart) which were replaced  
191 twice a day to avoid depletion. Other food sources were removed during the observations.

192 Each single-sex group was observed (9 a.m.–1 p.m.) for 15 days (females: 22 June–12  
193 July 2009; males: 13–30 July 2009). The presence of all individuals on the patches was  
194 recorded every 4 minutes. This interval was longer than the mixing time among individuals  
195 (i.e., the time individuals need to exchange who they are association with), in order to ensure  
196 independence of observations (Croft et al., 2008). Associations at feeding patches was rarely  
197 the same in consecutive records (females: 5.9%; males: 7.9%). Observations were  
198 occasionally interrupted for 10 minutes in the event of an external disturbance. Since patch  
199 size (40 x 20 cm) and group size (mean females = 1.9, range 1–5; mean males = 2.0, range 1–  
200 5; Fig. A1a, b) were small, we assumed that animals grazing on the same patch during a  
201 sampling period were associating (a.k.a. gambit of the group, Franks et al., 2010; Whitehead,  
202 2008).

203 The results of the foraging associations before pair formation are reported in Kurvers  
204 et al. (2013). In brief, in both sexes, familiarity and genetic relatedness predicted association  
205 strength, whereas boldness and dominance did not. Therefore, we focus here on the role of  
206 familiarity and genetic relatedness in governing the stability of long-term associations.

207

208 **Observations after pair formation: breeding and wintering**

209 Geese remained in the single-sex groups for six months and were then placed together in one  
210 group (January 2010; Fig. 1). By then, most geese were 2.5 years of age, approximating the  
211 average age of final pair formation in barnacle geese (Choudhury & Black, 1994; van der  
212 Jeugd & Blaakmeer, 2001). Pair formation started rapidly, and most geese quickly formed a  
213 stable pair bond. Before starting the first post-pair formation association observations, 37 (of  
214 44) geese had formed stable pair bonds. In total, geese formed 12 pairs (11 male-female pairs,  
215 and one male-male pair), four triplets (three geese continuously moving together as one unit  
216 without any aggression; two triplets consisted of two females and one male, and two triplets  
217 of one female and two males) and seven geese (3 males, 4 females) remained unpaired. The  
218 occurrence of triplets has also been observed in the wild, with a third party joining a pair  
219 between 10 months and 4 years, however incidence in the field was lower (Black et al., 1996).  
220 As reported in Kurvers et al. (2013) genetic relatedness did not play a role in mate choice,  
221 whereas geese actively selected against familiarity in selecting a mate. After the geese formed  
222 pair relationships, and during their first breeding season, we again conducted observations of  
223 foraging associations. We placed 10 grass patches (40 x 40 cm) in the aviary. Observations  
224 were conducted for five weeks (31 May–2 July 2010, 25 observation days) in two 2-hour  
225 blocks per day (8 a.m.–1 p.m.) following the same observation protocol described above.  
226 During the breeding season, many of the paired individuals started building nests and laying  
227 eggs. We regularly checked all nests and removed any eggs to avoid the hatching of goslings.

228 To study the stability of associations across seasons, we repeated the observations of  
229 foraging associations six months later, during the wintering season, following the same  
230 protocol (17 December 2010–4 February 2011, 13 observation days). Comparing the pair  
231 status of all geese between the breeding and wintering seasons, we observed that all pair  
232 relationships but one remained the same—the one pair relationship that changed was the  
233 male-male pair. This reflects the strong and long lasting pair bonds in barnacle geese, which

234 generally stay together until one of the pair members dies (Black, 2001). One individual died  
235 in between the breeding and wintering observations. To facilitate comparison across seasons,  
236 we removed this individual from all analyses. The final sample size was thus 42 individuals  
237 (20 females, 22 males).

238

### 239 **Agonistic interactions**

240 During all three observation periods (early life, breeding, wintering), we collected data on  
241 agonistic interactions to study the role of aggression on the stability of early-life associations.  
242 In between scoring the presence of individuals on the patches, we scored the winner and loser  
243 of agonistic interactions, defined as a direct confrontation between two geese and ranging  
244 from threats with lowered head and neck to active chases with flapping wings. In the early-  
245 life observations, we identified a total of 1,429 interactions in the female group and 2,619  
246 interactions in the male group. We then identified 3,411 and 786 interactions during the  
247 subsequent breeding and wintering periods, respectively.

248

### 249 **Statistical analyses**

250

#### 251 *Stability of early-life connections*

252 We used social network analysis to investigate carry-over effects of dyadic associations  
253 between seasons. Within the networks, nodes represent individuals and are connected by  
254 edges that represent associations. The edge weight varied with dyadic association strength.  
255 From the observation data, we thus generated undirected weighted networks (i.e., networks  
256 based on associations without initiators or receivers) for each of the three periods (early life,  
257 breeding season, and wintering season). Edge weights in the networks were calculated using  
258 the simple ratio index (SRI) as an association measure using the ‘asnipe’ package (Farine,  
259 2013) in R (v. 3.4.4). The SRI indicates the probability of observing two individuals in

260 association with each other given that one was observed. Values range from 0 (two  
261 individuals were never observed together) to 1 (two individuals were always observed  
262 together). The SRI is considered an effective measure of dyadic association strength provided  
263 there are no large sampling biases (Farine & Whitehead, 2015; Ginsberg & Young, 1992;  
264 Hoppitt & Farine, 2018). Since all observations were performed within aviaries in which all  
265 individuals feeding on all patches could be easily observed, we did not expect a strong  
266 sampling bias.

267 We first analysed whether early-life associations (within the same sex) were  
268 maintained after pair formation, i.e. during the subsequent breeding and wintering season.  
269 Within each sex, we performed Mantel tests using the built-in node permutation test from the  
270 ‘vegan’ library Mantel test function—running 50,000 permutations and using the spearman  
271 correlation (Oksanen et al., 2019)—to compare dyads’ association strength between (i) early  
272 life and breeding season, and (ii) early life and wintering season. We started with a separate  
273 matrix for each sex for the early-life associations, one matrix (containing both sexes) for the  
274 breeding season, and one matrix for the wintering season. To compare the matrix correlation  
275 for females (/males), we therefore first subset all females (/males) from the breeding and  
276 wintering matrix, constructing single-sex matrices. To confirm that our results were not  
277 mainly driven by the associations of the unpaired individuals (as we were primarily interested  
278 in the possible continuation of associations after pair formation), we repeated these analyses  
279 after further excluding associations between the unpaired individuals. To investigate if our  
280 results were driven by a few strong associations, we also repeated this analysis while  
281 excluding all associations with an SRI value higher than 0.1.

282

### 283 *Genetic relatedness and familiarity*

284 To investigate which factors might underlie a possible continuation of associations after pair  
285 formation, we studied the effect of genetic relatedness and familiarity on dyadic association

286 strength during the breeding and wintering season. We tested the effect of familiarity and  
287 relatedness using multiple regression quadratic assignment procedures (MRQAP; Krackhardt,  
288 1988) using the `mrqap.dsp` function in the R package `asnipe` (Farine, 2013). With this  
289 procedure, the association matrix was first regressed against two matrices, one with data on  
290 relatedness and one on familiarity. We used a version of the function allowing us to combine  
291 the `mrqap.dsp` model with pre-network permutations (Farine, 2017). Specifically, we  
292 generated 1,000 random networks by re-organising the observations of individuals in the  
293 original group-by-individual matrices following the method first described by Bejder et al.  
294 (1998). We then compared the resulting distribution of coefficient values from these permuted  
295 networks to the coefficient value generated from the original observation data to obtain  $P$ -  
296 values. Further, because our random distributions were not centred on 0 (see Farine, 2017),  
297 we rescaled measures to an effect size by taking the difference between the observed  
298 coefficient values and the mean of the corresponding distribution of coefficient values based  
299 on the permuted networks. We performed the MRQAP separately for each season and sex.

300

### 301 *Patch visits and aggression*

302 As we found sex differences in the continuation of early-life associations (see below), we  
303 investigated the role of patch visitation rates and aggression as potential underlying  
304 mechanisms. For each individual, for each period, we calculated the mean number of patch  
305 visits per hour. We then used a Mann-Whitney U test to determine whether the sexes differed  
306 in their patch visitation rates in each of the three seasons. Similarly, for each individual and  
307 for each season, we determined the mean number of aggressive interactions initiated per hour,  
308 and tested whether the sexes differed in their likelihood to display aggression in each of the  
309 three seasons.

310

### 311 **Ethical permission**

312 The animal ethical committee of both the Royal Netherlands Academy of Arts and Sciences  
313 (KNAW) and the Wageningen University approved all experiments [protocol numbers:  
314 2010008.b (blood sampling)]. Geese were obtained from a waterfowl breeding farm (Kooy  
315 and Sons, 't Zand, the Netherlands) and returned there after the experiments had finished.

316

317

## 318 **Results**

319

### 320 **Sex- and season-dependent effects of persistence of early-life associations**

321 We quantified the foraging association networks for each of the three observation periods  
322 (i.e., early life, breeding season, and wintering season, see Fig. 2), and compared the strength  
323 of the dyadic associations that were formed early in life to those in subsequent seasons. We  
324 found that a female's dyadic association strengths from early life (i.e. prior to pair formation)  
325 were not significantly correlated with its dyadic association strengths to the same pool of  
326 individuals (i.e. other females) in the subsequent breeding season ( $r = 0.04$ ;  $P = 0.32$ ; Fig.  
327 3a). A female's early-life dyadic association strengths were, however, significantly correlated  
328 with its dyadic association strengths in the subsequent wintering season ( $r = 0.18$ ;  $P = 0.019$ ;  
329 Fig. 3b). A male's early-life dyadic association strengths were significantly correlated with its  
330 dyadic association strengths to other males in both the subsequent breeding ( $r = 0.26$ ;  $P =$   
331  $0.002$ ; Fig. 3c) and the following wintering season ( $r = 0.31$ ;  $P = 0.002$ ; Fig. 3d).

332 When excluding the associations among individuals that remained unpaired (7 of 42;  
333 but maintaining the associations between paired and unpaired individuals), we obtained  
334 similar results (females: early life vs. breeding:  $r = 0.00$ ,  $P = 0.49$ ; early life vs. wintering:  $r$   
335  $= 0.19$ ,  $P = 0.018$ ; males: early life vs. breeding:  $r = 0.26$ ,  $P = 0.003$ ; early life vs. wintering:  
336  $r = 0.31$ ,  $P = 0.003$ ).

337           When excluding all dyadic associations with an SRI value above 0.1 (which excluded  
338 38 associations for females (7% of all associations) and 26 for males (5%)), we, again,  
339 obtained similar results (females: early life vs. breeding:  $r = 0.00$ ,  $P = 0.52$ ; early life vs.  
340 wintering:  $r = 0.18$ ,  $P = 0.022$ ; males: early life vs. breeding:  $r = 0.23$ ,  $P = 0.004$ ; early life  
341 vs. wintering:  $r = 0.34$ ,  $P = 0.002$ ).

342

### 343 **Genetic relatedness and familiarity do not drive associations in females or males**

344 In females, there was no effect of genetic relatedness or familiarity on dyadic association  
345 strength in the breeding season (effect sizes: genetic relatedness: -0.00006; familiarity:  
346 0.0001) or in the wintering season (genetic relatedness: 0.0016; familiarity: 0.0001).  
347 Likewise, for males, we found no effect of genetic relatedness or familiarity on dyadic  
348 association strength in the breeding season (genetic relatedness: -0.00035; familiarity: -  
349 0.00006) or in the wintering season (genetic relatedness: 0.0002; familiarity: -0.00026).  
350 Thus, although familiarity and genetic relatedness positively impacted single-sex associations  
351 in females and males in early life (see Kurvers et al., 2013 and see Fig. A2 and Fig. A3), these  
352 factors did not drive same-sex associations after pair formation (all  $P > 0.1$ ).

353

### 354 **Elevated aggression in males and during the breeding season**

355 We investigated two mechanisms that might drive the disappearance of social associations in  
356 females—but not males—during the breeding season. First, females may simply visit the food  
357 patches less than males during the breeding season, which would lower their opportunities for  
358 maintaining relationships. Though females visited patches less than males in the single-sex  
359 groups before pair-formation ( $W = 50$ ,  $P < 0.001$ ; Fig. 4a), females visited the patches equally  
360 often as males in the breeding and wintering season (both  $P > 0.35$ ; Fig. 4b, c), ruling out this  
361 explanation.

362 A second mechanism might be that males, being generally the more dominant member  
363 of a pair, play a stronger role in determining the association members of a pair than do  
364 females, especially in the breeding season. Before pair formation, males showed a higher  
365 level of aggression than females in the single-sex groups ( $W = 142$ ,  $P = 0.049$ ; Fig. 4d).  
366 Likewise, males showed a substantially higher level of aggression than females during the  
367 breeding ( $W = 8$ ,  $P < 0.001$ ; Fig. 4e) and wintering seasons ( $W = 39$ ,  $P < 0.001$ ; Fig. 4f).  
368 Males displayed equal levels of aggression towards males and females in the breeding season  
369 (Wilcoxon signed-rank test:  $V = 76$ ,  $P = 0.10$ , Fig. 4e) but slightly higher levels of aggression  
370 towards males than females in the wintering season ( $V = 50$ ,  $P = 0.02$ ; Fig. 4f). As expected,  
371 male geese displayed higher levels of aggression in the breeding than in the wintering season  
372 (Wilcoxon signed-rank test, males only:  $V = 240$ ,  $P < 0.001$ ; Fig. 4e, f). In accordance, the  
373 mean group size at patches was higher during the wintering than during the breeding season  
374 (mean group size wintering: 2.4; breeding: 2.0; Fig. A1c, d). Moreover, paired individuals  
375 were more tolerant to the presence of other individuals (i.e., not belonging to the pair) at a  
376 patch during wintering season. In the breeding season, in 80% of cases when pair members  
377 were observed together on a patch, there were no other individuals present. In the wintering  
378 season, this percentage dropped to 60% (mean number of non-pair individuals at a patch with  
379 a pair during breeding: 0.26, during wintering: 0.76; Fig. A4c, d). This is also apparent in the  
380 network graphs showing more edges during the wintering season (Fig. 2c, d).

381

382

## 383 **Discussion**

384 Maintaining stable social associations across time and contexts can have adaptive benefits  
385 (Kohn, 2017). Yet the importance of the early-life period for the formation of such long-term  
386 stable relationships has so far received little attention. Here we show that early-life same-sex



387 foraging associations can persist after a major life-history transition—pair formation—in a  
388 monogamous and long-lived bird species. However, which associations were maintained  
389 depended on sex and season. Early-life associations in females were lost during the breeding  
390 season, but resurfaced again during the subsequent wintering season. In males, the early-life  
391 associations persisted across both seasons. We found no evidence of genetic relatedness or  
392 familiarity on association persistence. Elevated male aggression likely influenced the limited  
393 number of contacts outside of the pair bond during the breeding season—and thereby the  
394 extent to which early-life associations could be maintained, especially by females during the  
395 breeding season. Our findings extend the understanding of how social relationships develop  
396 and are maintained over different life-history phases and how their importance to individuals  
397 may vary with season.

398         Across taxa, females are well-known for maintaining long-term social relationships  
399 (Cameron et al., 2009; Carter et al., 2013; Ilany et al., 2015; Silk et al., 2003), which is  
400 commonly attributed to their reproductive strategies. In our study, males, not females,  
401 maintained their associations throughout both the breeding and wintering season. Benefits of  
402 social relationships in males have been observed in other species: male red-winged blackbirds  
403 (*Agelaius phoeniceus*) that bred close to familiar neighbours fledged more offspring (Beletsky  
404 & Orians, 1989) and male Assamese macaques (*Macaca assamensis*) with stronger social  
405 associations sired more offspring (Schulke et al., 2010). Males can thus clearly form, and  
406 benefit from, long-lasting social relationships.

407         Social relationships in males often take the form of coalitions or alliances (Connor et  
408 al., 2017; Gilby et al., 2013; Schulke et al., 2010), benefiting individuals by providing  
409 cooperation partners in agonistic interactions with conspecifics. But reduced aggression, for  
410 instance, via dear-enemy effects (Temeles, 1994), can likewise be an important benefit of  
411 maintaining long-term social relationships, especially in territorial animals (Chuang et al.,  
412 2017; Jaeger, 1981; Siracusa et al., 2019). Additionally, repeated association with certain

413 individuals can influence vigilance behaviour, with individuals showing reduced vigilance in  
414 the proximity of well-known conspecifics (Carter et al., 2009; Kutsukake, 2006). In a  
415 monogamous prey species such as barnacle geese, in which the male spends much of its time  
416 during the breeding season on vigilance at the expense of foraging (Forslund, 1993), such  
417 benefits can be especially substantial. The expected benefits of maintaining long-term social  
418 relationships vary with ecological and social conditions (Connor et al., 2017; Kappeler et al.,  
419 2013; Maher & Burger, 2011), and studying the social structure of both sexes in taxa with  
420 distinct space use (e.g., natal philopatry), life history (e.g., long life-span), social organization  
421 (e.g., fission-fusion), and mating system (e.g., monogamy) characteristics, offers us greater  
422 insight into the drivers and constraints of maintaining long-term stable associations in animal  
423 societies.

424         The apparent lack of social association persistence for females in the breeding season  
425 is surprising, but adds to our understanding of social flexibility by showing that the  
426 persistence of social relationships not only varies between species and individuals (Kappeler  
427 et al., 2013) but can also have sex-specific effects across seasons. Female chacma baboons  
428 (*Papio hamadryas ursinus*) were similarly found to vary in their social preferences depending  
429 on ecological context (Henzi et al., 2009): social preferences were more pronounced when  
430 food resources were scarce, but females acted more “gregariously” (i.e., without social  
431 preferences) when resources were plentiful. For geese, winter is a time when resources  
432 become scarce; barnacle geese, however, are highly gregarious in winter (Black et al., 2014),  
433 possibly to access social information on foraging opportunities (Drent & Swierstra, 1977;  
434 Kurvers et al., 2009; Kurvers et al., 2010) (but see Kurvers et al., 2014). Alternatively, the  
435 fluctuations in female social preferences may have been the result of the male partner  
436 unselectively excluding his partner’s—but not his own—early-life companions during the  
437 breeding season. The high level of aggression displayed by the males during the breeding  
438 season compared to the wintering season supports this hypothesis.

439           The absence of continued association with early-life companions in females in the  
440 breeding season appears to be in contrast to previous findings. An earlier study on wild  
441 barnacle geese found that female, but not male, geese exhibited social preferences in terms of  
442 nesting proximity, with females nesting closer to familiar females (van der Jeugd et al., 2002).  
443 It is possible that nest choice offers female geese an alternative way to maintain early-life  
444 social associations, circumventing the potentially controlling influence of their partner during  
445 foraging. Possibly, breeding in proximity to familiar and/or related conspecifics provides  
446 context-specific benefits that foraging together does not. Intraspecific brood parasitism and  
447 adoption is common in waterfowl (Anderholm et al., 2009a; Andersson et al., 2019;  
448 Choudhury et al., 1993; Forslund & Larsson, 1995) and breeding close to related individuals  
449 may decrease the costs, through inclusive fitness benefits, of having to care for additional  
450 offspring. Moreover, breeding in proximity could enable siblings to defend each other's nests  
451 against unrelated brood parasites. Female siblings may also actively or passively support each  
452 other in the acquisition of high-quality nest locations. Indeed, in geese, social support from  
453 family members is known to give individuals an advantage in competitive interactions,  
454 starting from an early age (Black & Owen, 1989; Raveling et al., 2000; Scheiber et al., 2009;  
455 Scheiber et al., 2005). Lastly, neighbouring barnacle geese pairs are known to defend their  
456 nests together (Black & Owen, 1995) and nesting closely to familiars may facilitate  
457 cooperative nest defence (Grabowska-Zhang et al., 2012; Olendorf et al., 2004). Nest  
458 predation is a major threat for geese (Drent & Prop, 2008) that exposes the females in  
459 particular to considerable predation risk (Samelius & Alisauskas, 2006).

460           Our captive study design had several important limitations compared to natural  
461 settings. First, the group size under study was relatively small compared to natural groups. In  
462 natural groups, the number of genetically related and/or familiar individuals may be  
463 substantially higher, allowing geese more opportunities to associate with these types of  
464 individuals. Second, the space available to our subjects was reduced as compared to natural

465 conditions. This may have led to higher levels of aggression, especially among males, and/or,  
466 more and stronger associations as compared to more natural settings. Third, we removed the  
467 eggs of breeding females to avoid the undesired hatching of more experimental animals. This  
468 may have caused heightened aggression, and may have had repercussions for social  
469 relationships. The pair bonds did, however, almost all remain intact till the next wintering  
470 season, suggesting that egg removal did not cause major disruption of pair bonds.

471 Taken together, our findings suggest that different types of social associations may be  
472 beneficial in different contexts and that the early-life period can be a crucial time for the  
473 formation of these associations. The next step is to disentangle whether individuals actively  
474 choose to (re)associate with earlier companions depending on season- and context-dependent  
475 benefits, or whether the observed fluctuations in social association persistence are an  
476 emergent property following relatively simple season-dependent social processes, such as  
477 heightened aggression. The first scenario may have important implications for our  
478 understanding of the cognitive abilities of animals. Notably, Scheiber et al. (2011) found that  
479 six-week-old juvenile greylag geese can already discriminate between two of their siblings,  
480 showing that individual-level recognition is already present from an early age. Our findings  
481 here suggest that geese may be able to keep track of multiple types of relationships in a large  
482 fission–fusion society, despite extended breaks, supporting similar observations in wild  
483 barnacle geese (Black & Owen, 1995), and that they can re-evaluate the benefits of these  
484 relationships depending on context. Given the strong evidence for birthplace-independent  
485 long-term kin discrimination in both migrating and captive barnacle geese (Anderholm et al.,  
486 2009b; Kurvers et al., 2013; van der Jeugd et al., 2002), this level of cognitive ability is  
487 certainly feasible and makes the long-lived barnacle goose an interesting study system to  
488 further examine such mechanisms. Complex social patterns can be driven by cognitive ability,  
489 but also emerge from relatively simple processes (Kappeler, 2019), such as site fidelity  
490 combined with season- and sex-dependent aggression. Unravelling how these mechanisms

491 underlie social complexity in a diversity of social systems will be central to our understanding  
492 of the evolution of animal societies.

493

494

#### 495 **Acknowledgements**

496 We thank Bart van Lith from the Netherlands Institute of Ecology for the caretaking of the  
497 birds, and Chantal Althuizen and Jan Baar for help during the social network observations.

498 We thank Herbert Prins, Ron Ydenberg and Sip van Wieren for their guidance on the  
499 experimental design. We thank the Faunafonds and the Koninklijke Nederlands Jagers

500 Vereniging (KNJV) for financial support, and Bart Nolet and Marcel Klaassen for facilitating  
501 the animal holding facilities. We thank Rudy Jonker for blood sampling; Henk van der Jeugd

502 for sexing the geese; and Robert Kraus, Richard Crooijmans, Martien Groenen, Qiong Zhang  
503 and Bert Dibbits for the genetic lab work. Finally, we thank Deborah Ain for helpful

504 suggestions on the manuscript. D.R.F. was funded by the Max Planck Society and the DFG  
505 Centre of Excellence 2117 “Centre for the Advanced Study of Collective Behaviour” (ID:

506 422037984). L.S. was funded by a postdoc fellowship of the Alexander von Humboldt  
507 Stiftung (Ref 3.3 - NLD - 1192631 - HFST-P).

508

#### 509 **Data Availability Statement**

510 The raw social association observations, the matrices containing the SRI values per sex per  
511 season, the matrices containing the familiarity and genetic relatedness data per sex, and the

512 raw aggression data are uploaded on the Open Science Framework for referee inspection  
513 ([link](#)). These files will be made public in case of acceptance.

514

#### 515 **References**

- 516 Alexander, R. D. (1974). The Evolution of Social Behavior. *Annual Review of Ecology and*  
517 *Systematics*, 5(1), 325-383. doi: 10.1146/annurev.es.05.110174.001545
- 518 Anderholm, S., Marshall, R. C., van der Jeugd, H. P., Waldeck, P., Larsson, K., & Andersson,  
519 M. (2009a). Nest parasitism in the barnacle goose: evidence from protein  
520 fingerprinting and microsatellites. *Animal Behaviour*, 78(1), 167-174. doi:  
521 10.1016/j.anbehav.2009.04.011
- 522 Anderholm, S., Waldeck, P., Van der Jeugd, H. P., Marshall, R. C., Larsson, K., &  
523 Andersson, M. (2009b). Colony kin structure and host-parasite relatedness in the  
524 barnacle goose. *Molecular Ecology*, 18(23), 4955-4963. doi: 10.1111/j.1365-  
525 294X.2009.04397.x
- 526 Andersson, M., Åhlund, M., & Waldeck, P. (2019). Brood parasitism, relatedness and  
527 sociality: a kinship role in female reproductive tactics. *Biological Reviews*, 94(1), 307-  
528 327.
- 529 Bejder, L., Fletcher, D., & Brager, S. (1998). A method for testing association patterns of  
530 social animals. *Animal Behaviour*, 56, 719-725.
- 531 Beletsky, L. D., & Orians, G. H. (1989). Familiar neighbors enhance breeding success in  
532 birds. *Proceedings of the National Academy of Sciences*, 86(20), 7933-7936. doi:  
533 10.1073/pnas.86.20.7933
- 534 Black, J. M. (2001). Fitness consequences of long-term pair bonds in barnacle geese:  
535 monogamy in the extreme. *Behavioral Ecology*, 12(5), 640-645. doi:  
536 10.1093/beheco/12.5.640
- 537 Black, J. M., Choudhury, S., & Owen, M. (1996). Do barnacle geese benefit from lifelong  
538 monogamy? *Oxford Ornithology Series*, 6, 91-117.
- 539 Black, J. M., & Owen, M. (1989). Parent Offspring Relationships in Wintering Barnacle  
540 Geese. *Animal Behaviour*, 37, 187-198. doi: Doi 10.1016/0003-3472(89)90109-7
- 541 Black, J. M., & Owen, M. (1995). Reproductive performance and assortative pairing in  
542 relation to age in Barnacle geese. *Journal of Animal Ecology*, 64(2), 234-244. doi:  
543 10.2307/5758
- 544 Black, J. M., Prop, J., & Larsson, K. (2014). *The barnacle goose*. Bloomsbury, UK:  
545 Bloomsbury Publishing.
- 546 Blumstein, D. T., Wey, T. W., & Tang, K. (2009). A test of the social cohesion hypothesis:  
547 interactive female marmots remain at home. *Proceedings of the Royal Society B-*  
548 *Biological Sciences*, 276(1669), 3007-3012. doi: 10.1098/rspb.2009.0703
- 549 Cameron, E. Z., Setsaas, T. H., & Linklater, W. L. (2009). Social bonds between unrelated  
550 females increase reproductive success in feral horses. *Proceedings of the National*  
551 *Academy of Sciences of the United States of America*, 106(33), 13850-13853. doi:  
552 10.1073/pnas.0900639106
- 553 Carter, A. J., Macdonald, S. L., Thomson, V. A., & Goldizen, A. W. (2009). Structured  
554 association patterns and their energetic benefits in female eastern grey kangaroos,  
555 *Macropus giganteus*. *Animal Behaviour*, 77(4), 839-846.
- 556 Carter, K. D., Brand, R., Carter, J. K., Shorrocks, B., & Goldizen, A. W. (2013). Social  
557 networks, long-term associations and age-related sociability of wild giraffes. *Animal*  
558 *Behaviour*, 86(5), 901-910. doi: <https://doi.org/10.1016/j.anbehav.2013.08.002>
- 559 Choudhury, S., & Black, J. M. (1993). Mate selection behavior and sampling strategies in  
560 geese. *Animal Behaviour*, 46(4), 747-757.
- 561 Choudhury, S., & Black, J. M. (1994). Barnacle geese preferentially pair with familiar  
562 associates from early-life. *Animal Behaviour*, 48(1), 81-88.
- 563 Choudhury, S., Jones, C. S., Black, J. M., & Prop, J. (1993). Adoption of young and  
564 intraspecific nest parasitism in barnacle geese. *The Condor*, 95(4), 860-868.



- 565 Chuang, M.-F., Kam, Y.-C., & Bee, M. A. (2017). Territorial olive frogs display lower  
566 aggression towards neighbours than strangers based on individual vocal signatures.  
567 *Animal Behaviour*, *123*, 217-228.
- 568 Connor, R. C., Cioffi, W. R., Randic, S., Allen, S. J., Watson-Capps, J., & Krutzen, M.  
569 (2017). Male alliance behaviour and mating access varies with habitat in a dolphin  
570 social network. *Scientific Reports*, *7*, 46354. doi: 10.1038/srep46354
- 571 Croft, D. P., James, R., & Krause, J. (2008). *Exploring animal social networks*. Princeton,  
572 New Jersey: Princeton University Press.
- 573 Drent, R. H., & Prop, J. (2008). Barnacle goose *Branta leucopsis* survey on  
574 Nordenskiöldkysten, west Spitsbergen 1975–2007: breeding in relation to carrying  
575 capacity and predator impact. *Circumpolar Stud*, *4*, 59-83.
- 576 Drent, R. H., & Swierstra, P. (1977). Goose flocks and food finding: field experiments with  
577 Barnacle Geese in winter. *Wildfowl*, *28*, 15-20.
- 578 Farine, D. R. (2013). Animal social network inference and permutations for ecologists in R  
579 using asnipe. *Methods in Ecology and Evolution*, *4*(12), 1187-1194.
- 580 Farine, D. R. (2017). A guide to null models for animal social network analysis. *Methods in*  
581 *Ecology and Evolution*, *8*(10), 1309-1320. doi: 10.1111/2041-210x.12772
- 582 Farine, D. R., & Whitehead, H. (2015). Constructing, conducting and interpreting animal  
583 social network analysis. *Journal of Animal Ecology*, *84*(5), 1144-1163.
- 584 Firth, J. A., & Sheldon, B. C. (2016). Social carry-over effects underpin trans-seasonally  
585 linked structure in a wild bird population. *Ecology letters*, *19*(11), 1324-1332.
- 586 Forslund, P. (1993). Vigilance in relation to brood size and predator abundance in the  
587 barnacle goose, *Branta leucopsis*. *Animal Behaviour*, *45*(5), 965-973.
- 588 Forslund, P., & Larsson, K. (1995). Intraspecific nest parasitism in the barnacle goose:  
589 behavioural tactics of parasites and hosts. *Animal Behaviour*, *50*(2), 509-517.
- 590 Franks, D. W., Ruxton, G. D., & James, R. (2010). Sampling animal association networks  
591 with the gambit of the group. *Behavioral Ecology and Sociobiology*, *64*(3), 493-503.  
592 doi: 10.1007/s00265-009-0865-8
- 593 Frigerio, D., Weiss, B., & Kotrschal, K. (2001). Spatial proximity among adult siblings in  
594 greylag geese (*Anser anser*): evidence for female bonding? *Acta ethologica*, 121-125.
- 595 Gilby, I. C., Brent, L. J. N., Wroblewski, E. E., Rudicell, R. S., Hahn, B. H., Goodall, J., &  
596 Pusey, A. E. (2013). Fitness benefits of coalitionary aggression in male chimpanzees.  
597 *Behavioral Ecology and Sociobiology*, *67*(3), 373-381. doi: 10.1007/s00265-012-  
598 1457-6
- 599 Ginsberg, J. R., & Young, T. P. (1992). Measuring association between individuals or groups  
600 in behavioral studies. *Animal Behaviour*, *44*(2), 377-379. doi: 10.1016/0003-  
601 3472(92)90042-8
- 602 Grabowska-Zhang, A., Sheldon, B., & Hinde, C. (2012). Long-term familiarity promotes  
603 joining in neighbour nest defence. *Biology Letters*, *8*(4), 544-546.
- 604 Griffiths, S. W., Brockmark, S., Höjesjö, J., & Johnsson, J. (2004). Coping with divided  
605 attention: the advantage of familiarity. *Proceedings of the Royal Society of London.*  
606 *Series B: Biological Sciences*, *271*(1540), 695-699.
- 607 Henzi, S. P., Lusseau, D., Weingrill, T., van Schaik, C. P., & Barrett, L. (2009). Cyclicality in  
608 the structure of female baboon social networks. *Behavioral Ecology and Sociobiology*,  
609 *63*(7), 1015-1021. doi: 10.1007/s00265-009-0720-y
- 610 Hoppitt, W. J., & Farine, D. R. (2018). Association indices for quantifying social  
611 relationships: how to deal with missing observations of individuals or groups. *Animal*  
612 *Behaviour*, *136*, 227-238.
- 613 Ilany, A., Booms, A. S., & Holekamp, K. E. (2015). Topological effects of network structure  
614 on long-term social network dynamics in a wild mammal. *Ecology letters*, *18*(7), 687-  
615 695.

- 616 Jaeger, R. G. (1981). Dear enemy recognition and the costs of aggression between  
617 salamanders. *The American Naturalist*, *117*(6), 962-974.
- 618 Jonker, R. M., Zhang, Q., Van Hooft, P., Loonen, M. J., Van der Jeugd, H. P., Crooijmans, R.  
619 P., . . . Kraus, R. H. (2012). The development of a genome wide SNP set for the  
620 Barnacle goose *Branta leucopsis*. *PLoS One*, *7*(7), e38412. doi:  
621 10.1371/journal.pone.0038412
- 622 Kappeler, P. M. (2019). A framework for studying social complexity. *Behavioral Ecology*  
623 *and Sociobiology*, *73*(1), 13. doi: 10.1007/s00265-018-2601-8
- 624 Kappeler, P. M., Barrett, L., Blumstein, D. T., & Clutton-Brock, T. H. (2013). Constraints and  
625 flexibility in mammalian social behaviour: introduction and synthesis. *Philosophical*  
626 *Transactions of the Royal Society B: Biological Sciences*, *368*(1618), 20120337. doi:  
627 doi:10.1098/rstb.2012.0337
- 628 Kerth, G., Perony, N., & Schweitzer, F. (2011). Bats are able to maintain long-term social  
629 relationships despite the high fission-fusion dynamics of their groups. *Proceedings of*  
630 *the Royal Society B*, *278*(1719), 2761-2767. doi: 10.1098/rspb.2010.2718
- 631 Kohn, G. M. (2017). Friends give benefits: autumn social familiarity preferences predict  
632 reproductive output. *Animal behaviour*, *132*, 201-208.
- 633 Krackhardt, D. (1988). Predicting with networks: Nonparametric multiple regression analysis  
634 of dyadic data. *Social Networks*, *10*, 359-381.
- 635 Kraus, R. H. S., Kerstens, H., Van Hooft, P., Crooijmans, R., Van Der Poel, J., Elmberg, J., . .  
636 . Groenen, M. (2011). Genome wide SNP discovery, analysis and evaluation in  
637 mallard (*Anas platyrhynchos*). *BMC Genomics*, *12*(1), 150.
- 638 Krause, J., & Ruxton, G. (2002). *Living in Groups*. Oxford: Oxford University Press.
- 639 Kurvers, R. H., Straates, K., Ydenberg, R. C., van Wieren, S. E., Swierstra, P. S., & Prins, H.  
640 H. (2014). Social information use by barnacle geese *Branta leucopsis*, an experiment  
641 revisited. *Ardea*, *102*(2), 173-181.
- 642 Kurvers, R. H. J. M., Adamczyk, V. M. A. P., Kraus, R. H. S., Hoffman, J. I., van Wieren, S.  
643 E., van der Jeugd, H. P., . . . Jonker, R. M. (2013). Contrasting context dependence of  
644 familiarity and kinship in animal social networks. *Animal Behaviour*, *86*(5), 993-1001.  
645 doi: 10.1016/j.anbehav.2013.09.001
- 646 Kurvers, R. H. J. M., Eijkelenkamp, B., van Oers, K., van Lith, B., van Wieren, S. E.,  
647 Ydenberg, R. C., & Prins, H. H. T. (2009). Personality differences explain leadership  
648 in barnacle geese. *Animal Behaviour*, *78*(2), 447-453.
- 649 Kurvers, R. H. J. M., Prins, H. H. T., van Wieren, S. E., van Oers, K., Nolet, B. A., &  
650 Ydenberg, R. C. (2010). The effect of personality on social foraging: shy barnacle  
651 geese scrounge more. *Proceedings of the Royal Society B-Biological Sciences*,  
652 *277*(1681), 601-608.
- 653 Kutsukake, N. (2006). The context and quality of social relationships affect vigilance  
654 behaviour in wild chimpanzees. *Ethology*, *112*(6), 581-591.
- 655 Langenhof, M. R., & Komdeur, J. (2018). Why and how the early-life environment affects  
656 development of coping behaviours. *Behavioral Ecology and Sociobiology*, *72*(3), 34.  
657 doi: 10.1007/s00265-018-2452-3
- 658 Leris, I., & Reader, S. M. (2016). Age and early social environment influence guppy social  
659 learning propensities. *Animal Behaviour*, *120*, 11-19. doi:  
660 <https://doi.org/10.1016/j.anbehav.2016.07.012>
- 661 Lindström, J. (1999). Early development and fitness in birds and mammals. *Trends in*  
662 *Ecology & Evolution*, *14*(9), 343-348. doi: [https://doi.org/10.1016/S0169-](https://doi.org/10.1016/S0169-5347(99)01639-0)  
663 [5347\(99\)01639-0](https://doi.org/10.1016/S0169-5347(99)01639-0)
- 664 Linklater, W. L., & Cameron, E. Z. (2009). Social dispersal but with philopatry reveals incest  
665 avoidance in a polygynous ungulate. *Animal Behaviour*, *77*(5), 1085-1093.



- 666 Maher, C. R., & Burger, J. R. (2011). Intraspecific variation in space use, group size, and  
667 mating systems of caviomorph rodents. *Journal of Mammalogy*, 92(1), 54-64.
- 668 Milligan, B. G. (2003). Maximum-likelihood estimation of relatedness. *Genetics*, 163(3),  
669 1153-1167.
- 670 Mitani, J. C. (2009). Male chimpanzees form enduring and equitable social bonds. *Animal*  
671 *Behaviour*, 77(3), 633-640. doi: <https://doi.org/10.1016/j.anbehav.2008.11.021>
- 672 Oksanen, J., Blanchet, G., Friendly, M., Kindt, R., Legendre, P., McGlinn, D., . . . Wagner, H.  
673 (2019). vegan: Community Ecology Package. R package version 2.5-4.
- 674 Olendorf, R., Getty, T., & Scribner, K. (2004). Cooperative nest defence in red-winged  
675 blackbirds: reciprocal altruism, kinship or by-product mutualism? *Proceedings of the*  
676 *Royal Society of London. Series B: Biological Sciences*, 271(1535), 177-182.
- 677 Owen, M., Black, J. M., & Liber, H. (1988). Pair bond duration and timing of its formation in  
678 barnacle geese (*Branta leucopsis*). In M. W. Weller (Ed.), *Waterfowl in Winter*.  
679 Minneapolis, Minnesota: University of Minnesota Press.
- 680 Owen, M., & Wells, R. (1979). Territorial behaviour in breeding geese--a re-examination of  
681 Ryder's hypothesis. *Wildfowl*, 30(30), 20-26.
- 682 Percival, S. M. (1991). The Population-Structure of Greenland Barnacle Geese *Branta-*  
683 *Leucopsis* on the Wintering Grounds on Islay. *Ibis*, 133(4), 357-364.
- 684 Raveling, D. G., Sedinger, J. S., & Johnson, D. S. (2000). Reproductive success and survival  
685 in relation to experience during the first two years in Canada geese. *The Condor*,  
686 102(4), 941-945.
- 687 Robertson, G. J., & Cooke, F. (1999). Winter philopatry in migratory waterfowl. *The Auk*,  
688 116(1), 20-34.
- 689 Sachser, N., Dürschlag, M., & Hirzel, D. (1998). SOCIAL RELATIONSHIPS AND THE  
690 MANAGEMENT OF STRESS. *Psychoneuroendocrinology*, 23(8), 891-904. doi:  
691 [https://doi.org/10.1016/S0306-4530\(98\)00059-6](https://doi.org/10.1016/S0306-4530(98)00059-6)
- 692 Samelius, G., & Alisauskas, R. T. (2006). Sex-biased costs in nest defence behaviours by  
693 lesser snow geese (*Chen caerulescens*): consequences of parental roles? *Behavioral*  
694 *ecology and sociobiology*, 59(6), 805-810.
- 695 Scheiber, I. B. R., Hohnstein, A., Kotrschal, K., & Weiß, B. M. (2011). Juvenile Greylag  
696 Geese (*Anser anser*) Discriminate between Individual Siblings. *PLOS ONE*, 6(8),  
697 e22853. doi: 10.1371/journal.pone.0022853
- 698 Scheiber, I. B. R., Kotrschal, K., & Weiss, B. M. (2009). Benefits of family reunions: Social  
699 support in secondary greylag goose families. *Hormones and Behavior*, 55(1), 133-138.  
700 doi: 10.1016/j.yhbeh.2008.09.006
- 701 Scheiber, I. B. R., Weiss, B. M., Frigerio, D., & Kotrschal, K. (2005). Active and passive  
702 social support in families of greylag geese (*Anser anser*). *Behaviour*, 142, 1535-1557.  
703 doi: 10.1163/156853905774831873
- 704 Schulke, O., Bhagavatula, J., Vigilant, L., & Ostner, J. (2010). Social Bonds Enhance  
705 Reproductive Success in Male Macaques. *Current Biology*, 20(24), 2207-2210. doi:  
706 10.1016/j.cub.2010.10.058
- 707 Shizuka, D., Chaine, A. S., Anderson, J., Johnson, O., Laursen, I. M., & Lyon, B. E. (2014).  
708 Across-year social stability shapes network structure in wintering migrant sparrows.  
709 *Ecology Letters*, 17(8), 998-1007.
- 710 Silk, J. B. (2007). Social components of fitness in primate groups. *Science*, 317(5843), 1347-  
711 1351.
- 712 Silk, J. B., Alberts, S. C., & Altmann, J. (2003). Social bonds of female baboons enhance  
713 infant survival. *Science*, 302(5648), 1231-1234. doi: 10.1126/science.1088580
- 714 Silk, J. B., Beehner, J. C., Bergman, T. J., Crockford, C., Engh, A. L., Moscovice, L. R., . . .  
715 Cheney, D. L. (2009). The benefits of social capital: close social bonds among female

- 716 baboons enhance offspring survival. *Proceedings of the Royal Society B-Biological*  
717 *Sciences*, 276(1670), 3099-3104. doi: 10.1098/rspb.2009.0681
- 718 Silk, J. B., Beehner, J. C., Bergman, T. J., Crockford, C., Engh, A. L., Moscovice, L. R., . . .  
719 Cheney, D. L. (2010). Strong and Consistent Social Bonds Enhance the Longevity of  
720 Female Baboons. *Current Biology*, 20(15), 1359-1361. doi: 10.1016/j.cub.2010.05.067
- 721 Siracusa, E. R., Wilson, D. R., Studd, E. K., Boutin, S., Humphries, M. M., Dantzer, B., . . .  
722 McAdam, A. G. (2019). North American red squirrels mitigate costs of territory  
723 defence through social plasticity. *Animal behaviour*, 151, 29-42.
- 724 Stanley, C. R., Mettke-Hofmann, C., Hager, R., & Shultz, S. (2018). Social stability in  
725 semiferal ponies: networks show interannual stability alongside seasonal flexibility.  
726 *Animal Behaviour*, 136, 175-184.
- 727 Stanton, M. A., & Mann, J. (2012). Early social networks predict survival in wild bottlenose  
728 dolphins. *PLoS one*, 7(10), e47508.
- 729 Szipl, G., Depenau, M., Kotrschal, K., Hemetsberger, J., & Frigerio, D. (2019). Costs and  
730 benefits of social connectivity in juvenile Greylag geese. *Scientific Reports*, 9(1),  
731 12839. doi: 10.1038/s41598-019-49293-9
- 732 Temeles, E. J. (1994). The role of neighbours in territorial systems: when are they 'dear  
733 enemies'? *Animal Behaviour*, 47(2), 339-350.
- 734 van der Jeugd, H. P. (2001). Large barnacle goose males can overcome the social costs of  
735 natal dispersal. *Behavioral Ecology*, 12(3), 275-282.
- 736 van der Jeugd, H. P., & Blaakmeer, K. B. (2001). Teenage love: the importance of trial  
737 liaisons, subadult plumage and early pairing in barnacle geese. *Animal Behaviour*, 62,  
738 1075-1083.
- 739 van der Jeugd, H. P., van der Veen, I. T., & Larsson, K. (2002). Kin clustering in barnacle  
740 geese: familiarity or phenotype matching? *Behavioral Ecology*, 13(6), 786-790. doi:  
741 10.1093/beheco/13.6.786
- 742 Wang, J. L. (2011). COANCESTRY: a program for simulating, estimating and analysing  
743 relatedness and inbreeding coefficients. *Molecular Ecology Resources*, 11(1), 141-  
744 145. doi: 10.1111/j.1755-0998.2010.02885.x
- 745 Whitehead, H. (2008). *Analyzing animal societies: Quantative methods for vertebrate social*  
746 *analysis*. Chicago, Illinois: University of Chicago Press.
- 747 Ydenberg, R. C., Giraldeau, L. A., & Falls, J. B. (1988). Neighbours, strangers, and the  
748 asymmetric war of attrition. *Animal Behaviour*, 36(2), 343-347. doi:  
749 [https://doi.org/10.1016/S0003-3472\(88\)80004-6](https://doi.org/10.1016/S0003-3472(88)80004-6)
- 750 Zeus, V. M., Reusch, C., & Kerth, G. (2018). Long-term roosting data reveal a unimodular  
751 social network in large fission-fusion society of the colony-living Natterer's bat  
752 (*Myotis nattereri*). *Behavioral Ecology and Sociobiology*, 72(6), 99. doi:  
753 10.1007/s00265-018-2516-4
- 754

755

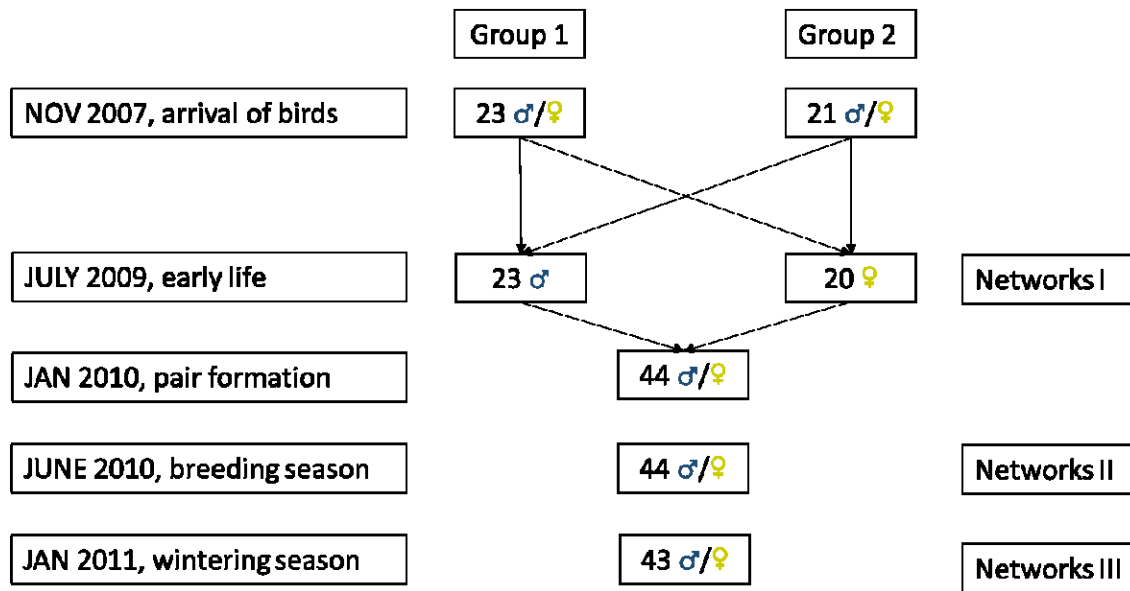

756

757

758 **Figure 1.** Schematic overview of the experimental procedures. Geese were procured in  
759 November 2007—at which point almost all were juveniles (hatched in 2007)—and placed in  
760 one of two familiarity groups. In July 2009, males and females of both groups were placed  
761 together and we quantified the social network structure of both groups (to examine the role of  
762 familiarity and genetic relatedness on social structure, Kurvers et al., 2013). In January 2010,  
763 all geese were placed together in one group and individuals rapidly started to form pairs. In  
764 the subsequent breeding season (June 2010) and wintering season (January 2011), we  
765 quantified the social network structure of the entire group. Note that the sex of one individual  
766 could not be reliably determined at the time of the first network observation and hence was  
767 not included in the early-life observations. Another individual died in between the breeding  
768 and wintering season. Both individuals were excluded from all analyses, resulting in a final  
769 sample size of 42 (20 females, 22 males).

770

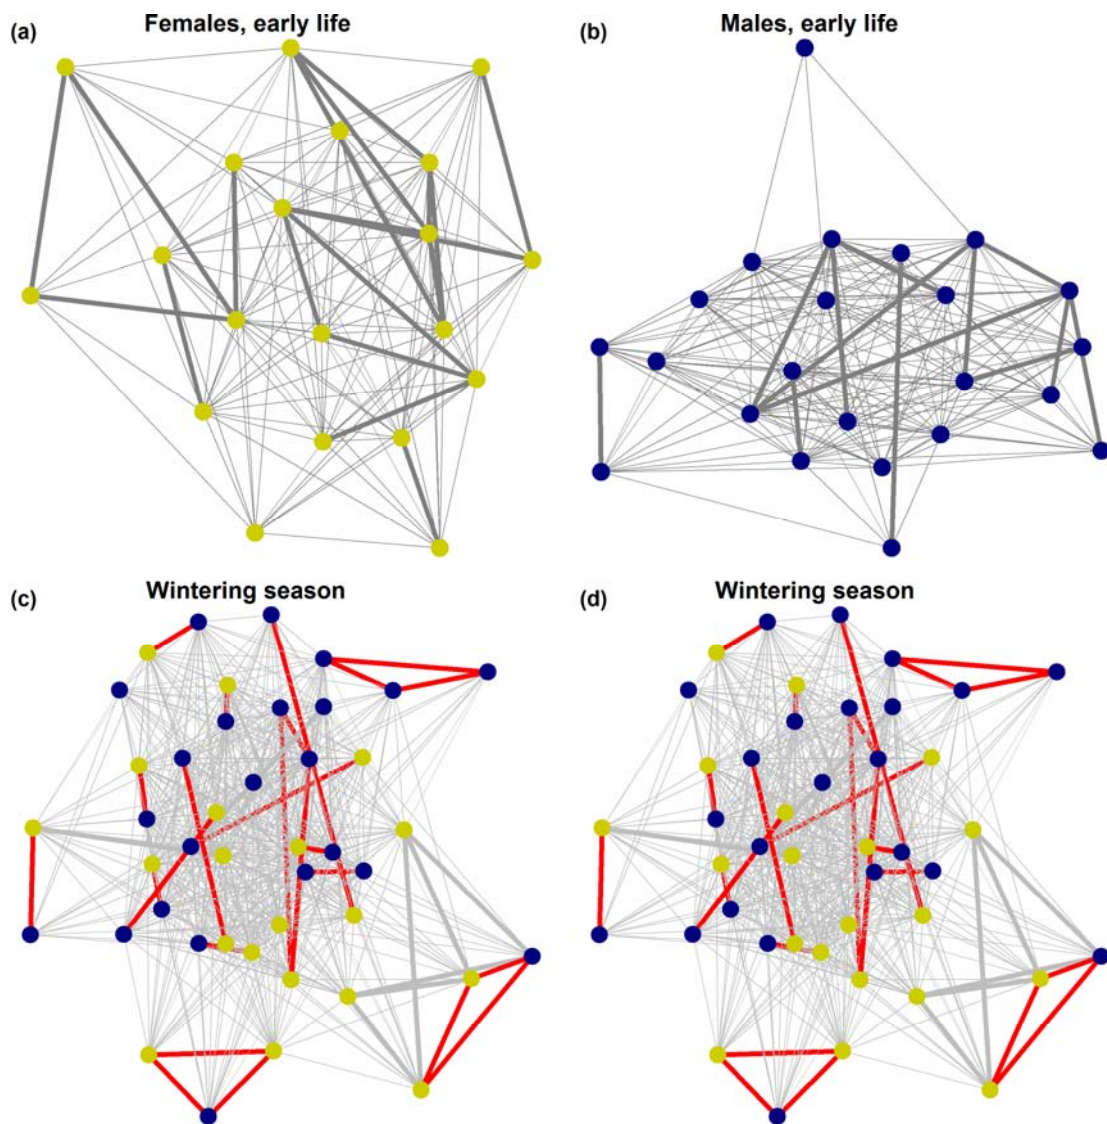

771  
772 **Figure 2.** The (a) female and (b) male network in single-sex groups prior to pair formation  
773 and the network of all individuals after pair formation during the (c) breeding, and (d)  
774 wintering season. Yellow/blue circles represent females/males respectively. For visualization,  
775 we removed associations below SRI values of 0.005. Thin/thick lines represent SRI values  
776 below/above 0.1. Coloured lines indicate a pair bond. Networks were created with the `ggnet2`  
777 function in R using the Fruchterman-Reingold algorithm for node placement.

778

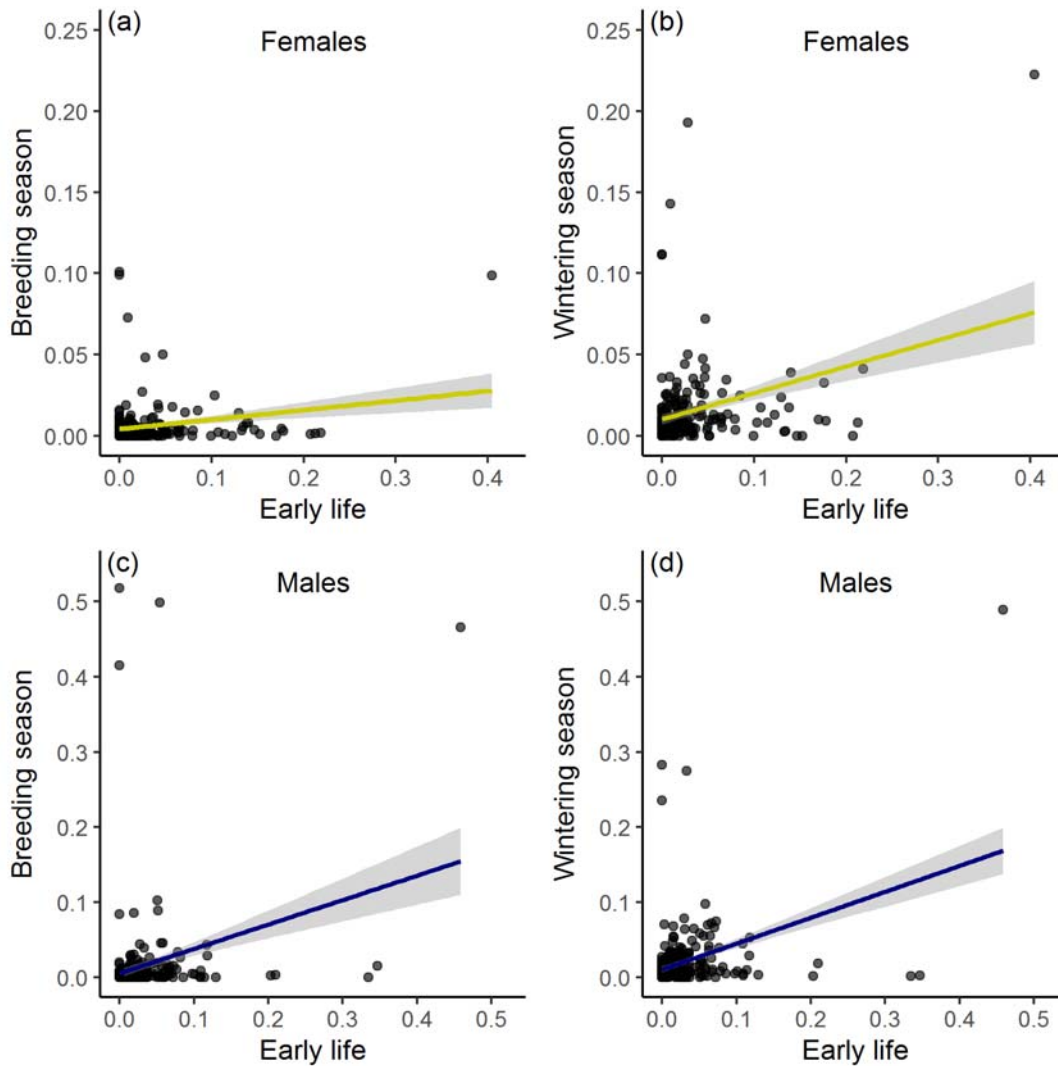

779

780 **Figure 3.** The relationship between the association strength of female dyads comparing (a)

781 early life and breeding season, and (b) early life and wintering season, and the relationship

782 between the association strength of male dyads comparing (c) early life and breeding season,

783 and (d) early life and wintering season. Lines are linear regression lines, including 95%

784 confidence bands.

785



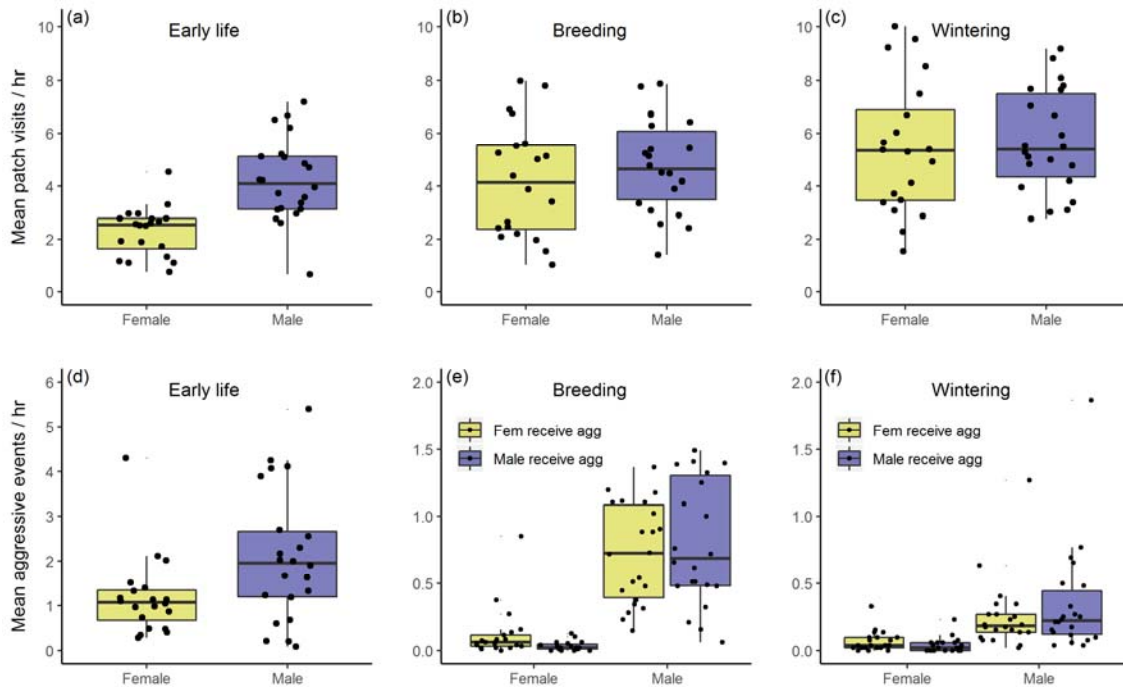

786

787 **Figure 4.** The mean number of patches visited per hour for (a) females and males in the  
788 single-sex groups prior to pair formation, and for both sexes during the (b) breeding and (c)  
789 wintering seasons after pair formation. The mean number of aggressive events initiated per  
790 hour for (d) females and males in the single-sex groups prior to pair formation, and for both  
791 sexes during the (e) breeding and (f) wintering season after pair formation. (e, f) Colours  
792 indicate the sex of the individual receiving the aggression. Dots represent individuals.  
793 Boxplots show median, interquartile ranges and whiskers show the lowest/highest values  
794 within the 1.5 interquartile range.

795

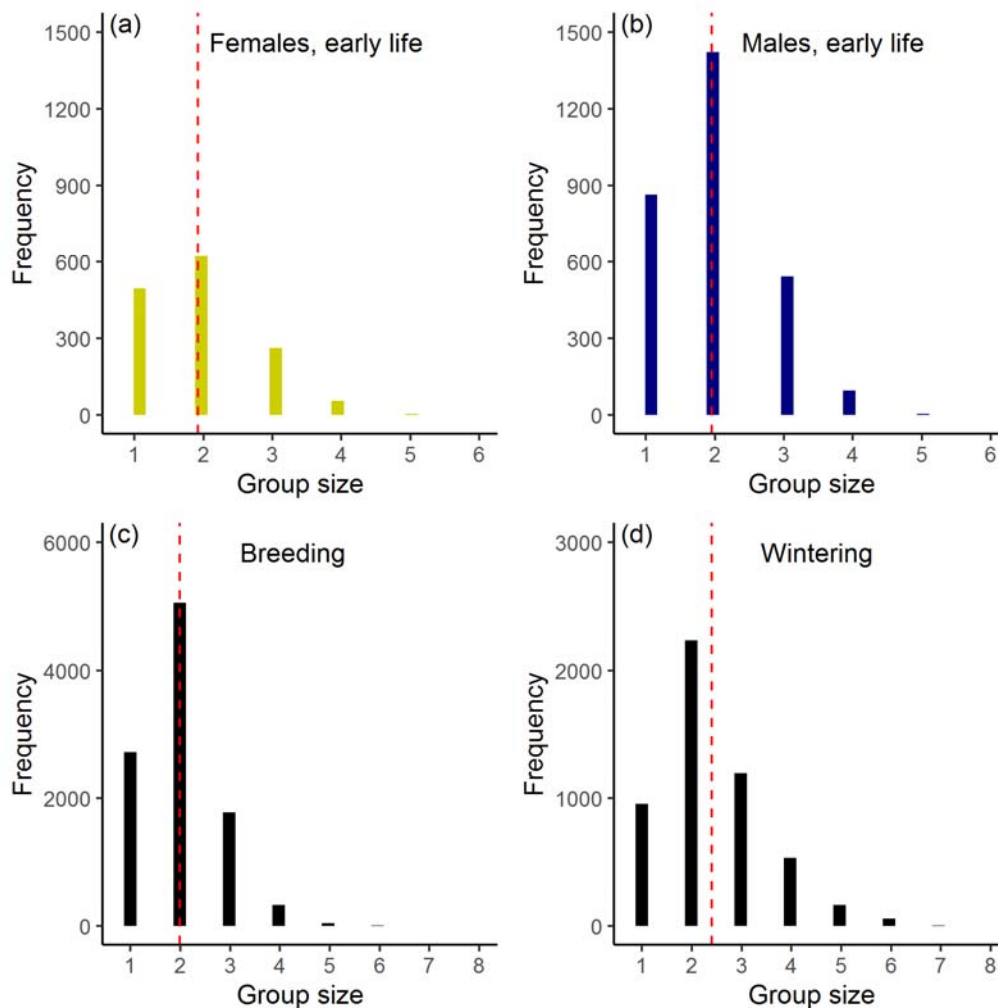

796

797 **Figure A1.** (a, b) The frequency of observed group sizes during the early-life social network  
798 observations for (a) females and (b) males. Red dashed lines represent mean group size (mean  
799 group size females: 1.92; males: 1.96). Males frequented patches at a higher rate (see also Fig.  
800 4a). (c, d) The frequency of observed group sizes during the (c) breeding and (d) wintering  
801 season. Red dashed lines represent mean group size (mean group size breeding: 2.0;  
802 wintering: 2.4). Note that the overall higher frequency of group sizes in the breeding season is  
803 due to more observation days during breeding ( $N = 25$  days) than during wintering season ( $N$   
804  $= 13$  days). The mean patch visit rate was in fact slightly higher in wintering than in breeding  
805 season (see Fig. 4b, c).

806

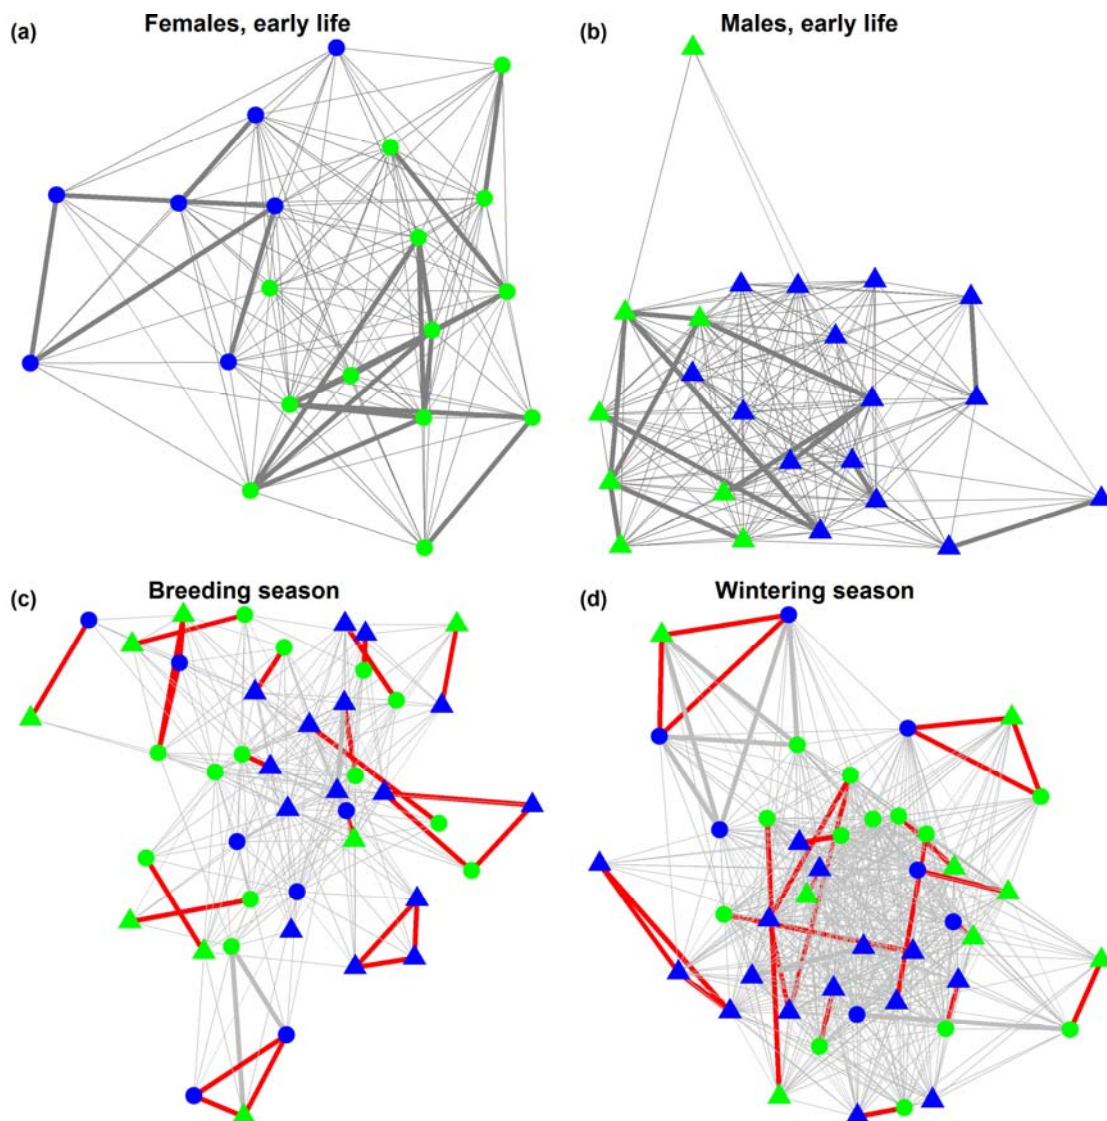

807

808 **Figure A2.** Nodes with the same colour indicate individuals coming from the same familiarity  
809 group. In the single-sex groups prior to pair formation, geese associated more with individuals  
810 from their own familiarity group as shown by the strong segregation of colours (and as  
811 reported in Kurvers et al., 2013). This pattern is, however, not present anymore in the  
812 breeding and wintering season. Circles represent females, and triangles males.

813



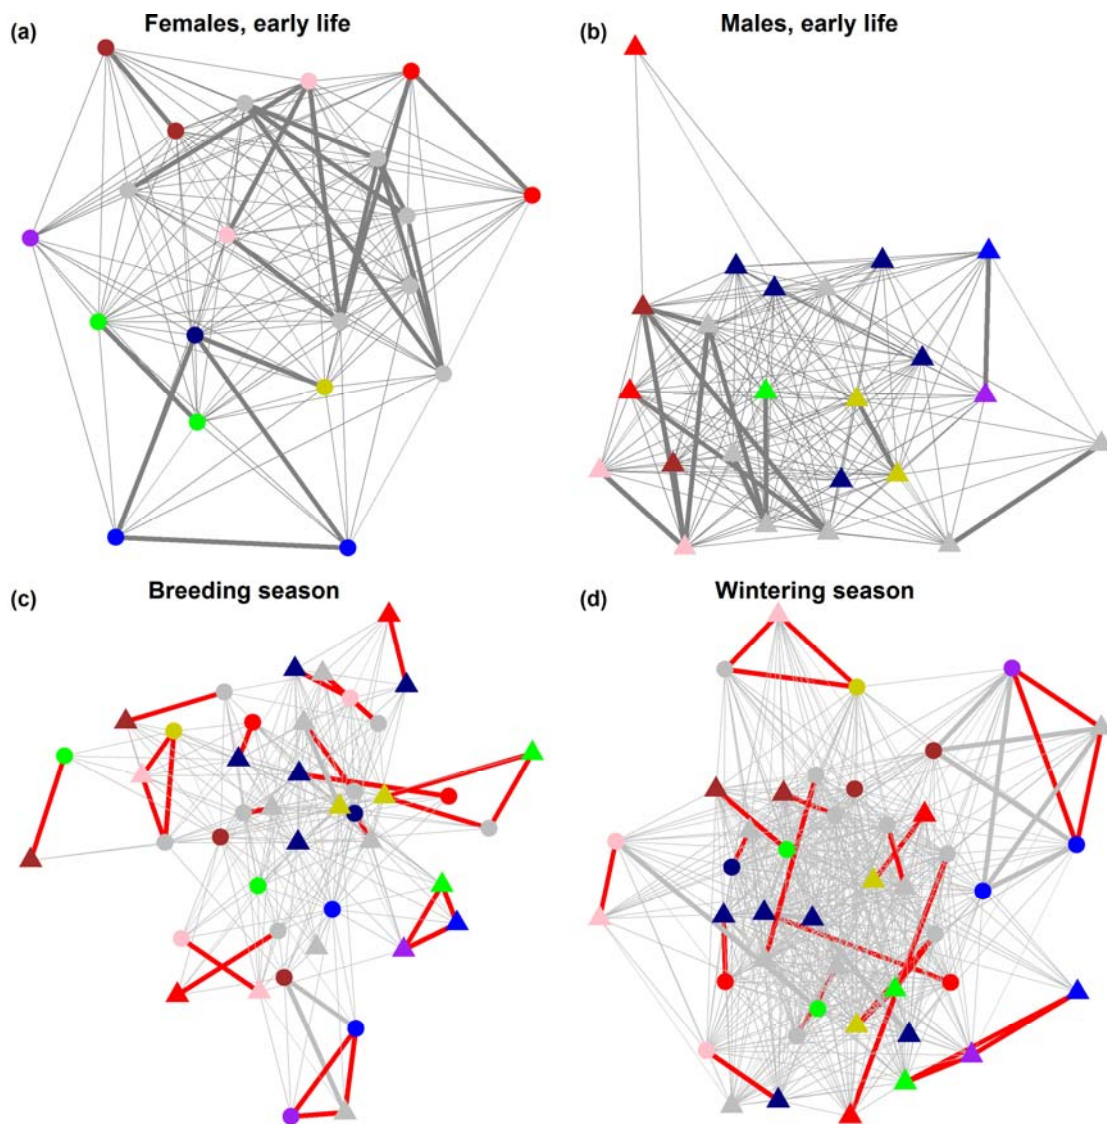

814

815 **Figure A3.** Nodes with the same colour indicate individuals with high genetic relatedness.

816 Each cluster of colours has a mean genetic relatedness above 0.3. Grey-coloured nodes

817 represent individuals not sharing a high genetic relatedness with any individual in the

818 population. In the single-sex groups before pair formation, geese associated more with

819 genetically related individuals colours (as reported in Kurvers et al., 2013). This pattern is,

820 however, not present anymore in the breeding and wintering season. Circles represent

821 females, and triangles males.

822

823

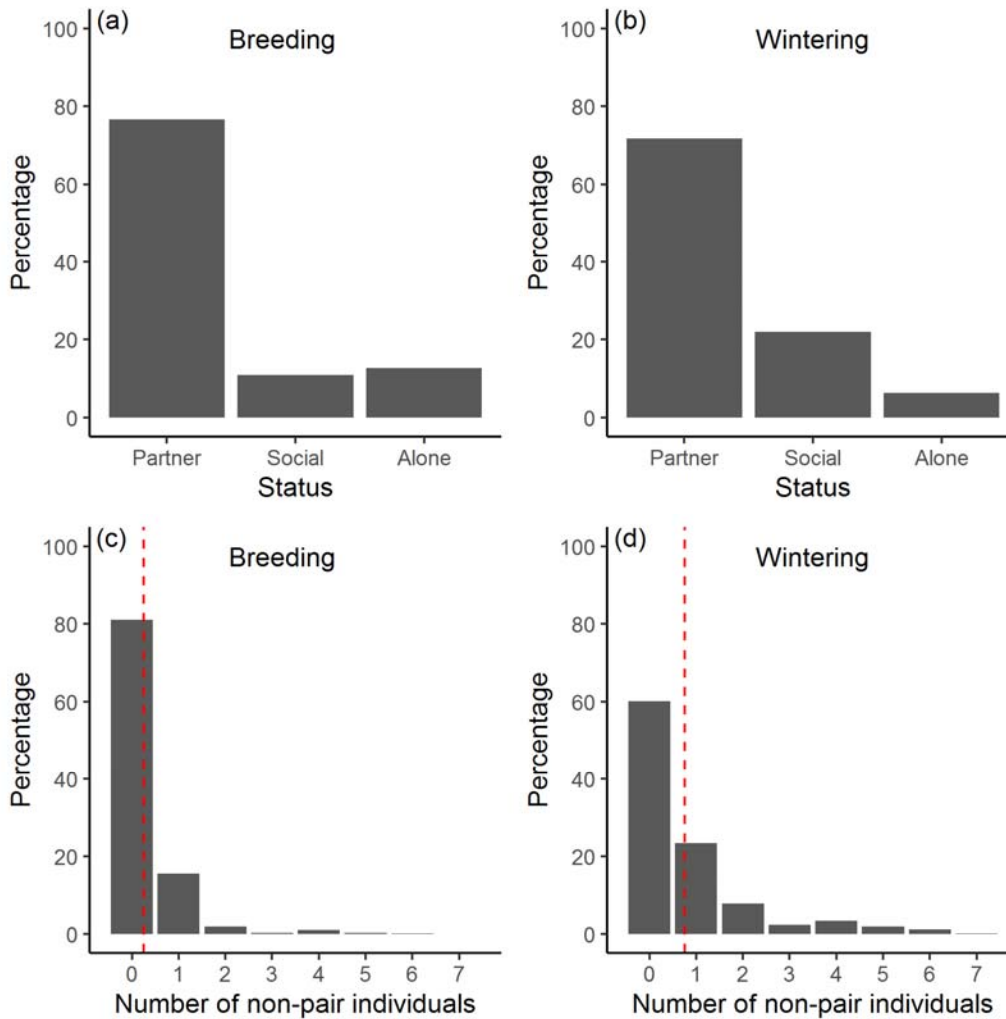

824

825 **Figure A4.** (a, b) The observed likelihood that when a paired individual was present on a  
826 patch that its partner was also present ('partner'), that it was together with another individual  
827 but not its partner ('social'), or that it was alone ('alone'), for the (a) breeding, and (b)  
828 wintering season. (c, d) The observed likelihood of the number of individuals not belonging to  
829 the pair, which were present at a patch in the presence of a pair during the (c) breeding, and  
830 (d) wintering season. To illustrate, in the breeding season, in 80% of cases when pair  
831 members were observed together on a patch, there would be no other individuals (i.e., not  
832 belonging to that pair) present. In the wintering season, this percentage was around 60%. Red  
833 dashed lines represent the average number of non-paired geese present with a pair (mean  
834 during breeding: 0.26, during wintering: 0.76).
